1 **Implementing *Essential Coaching for Every Mother* during COVID-19: A Pilot Pre-**  
2 **Post Intervention Study**

3 **Justine Dol**

4 Faculty of Health, Dalhousie University, Halifax, Canada

5

6 **Megan Aston**

7 School of Nursing, Dalhousie University, Halifax, Canada

8

9 **Amy Grant**

10 Maritime SPOR Support Unit, Halifax, Canada

11

12 **Douglas McMillan**

13 Department of Paediatrics, IWK Health Centre & Dalhousie University, Halifax,

14 Canada

15

16 **Gail Tomblin Murphy**

17 Nova Scotia Health Authority, Halifax, Canada

18

19 **Marsha Campbell-Yeo**

20 School of Nursing, Dalhousie University, Halifax, Canada

21

22 **Corresponding author:**

23 Justine Dol, MSc, Dalhousie University, Faculty of Health, [Justine.dol@dal.ca](mailto:Justine.dol@dal.ca); Twitter:

24 @JustineDol, <https://orcid.org/0000-0002-8928-7647>

25

NOTE: This preprint reports new research that has not been certified by peer review and should not be used to guide clinical practice.

26

## Abstract

27 **Objectives:** The primary objective was to evaluate the preliminary impact of *Essential*  
28 *Coaching for Every Mother* on self-efficacy, social support, postpartum anxiety and  
29 postpartum depression. The second objective was to explore the acceptability of the  
30 *Essential Coaching for Every Mother* program provided during the COVID-19  
31 pandemic.

32 **Methods:** A prospective pre-post study was conducted with first time mothers in Nova  
33 Scotia, Canada between July 15<sup>th</sup> and September 19<sup>th</sup>, 2020. Participants completed a  
34 self-report survey at enrolment (after birth) and six-weeks postpartum. Various  
35 standardized measures were used and qualitative feedback on the program was also  
36 collected. Paired t-tests were carried out to determine changes from baseline to follow-  
37 up on psychosocial outcomes and qualitative feedback was analysed through thematic  
38 analysis.

39 **Results:** A total of 88 women enrolled. Self-efficacy increased between baseline (B)  
40 and follow-up (F) ( $B:33.33$ ;  $F:37.11$ ,  $p=0.000$ ) while anxiety (STAI) declined ( $B:38.49$ ;  
41  $F:34.79$ ;  $p=0.004$ ). In terms of acceptability, 89% of participants felt that the number of  
42 messages were just right, 84.5% felt the messages contained all the information they  
43 needed relative to caring for a newborn and 98.8% indicated they would recommend  
44 this program to other new mothers.

45 **Conclusion:** *Essential Coaching for Every Mother* may play a role in increasing  
46 maternal self-efficacy and decreasing anxiety, although future work with a control  
47 group is needed to delineate the true effects of the program. Overall, mothers were  
48 satisfied with the *Essential Coaching for Every Mother* program and would recommend  
49 it for other mothers, during COVID-19 and beyond.

50 **Keywords:** mhealth; postpartum education; feasibility

## 51 **Introduction**

52 In the postpartum period, women face challenges in the ability to access information  
53 and find adequate support,<sup>1</sup> which has only been magnified during the COVID-19  
54 pandemic.<sup>2</sup> In March 2020, public health drop-in classes were closed indefinitely in  
55 Nova Scotia and public health visits turned virtual.<sup>3</sup> This contrasted pre-pandemic  
56 support of visits with family and friends or attending new parent groups<sup>4,5</sup> and in-person  
57 public health nurse visits.<sup>6</sup> Not surprisingly, studies have found that COVID-19 has  
58 resulted in a significant increase in rates of perinatal depression and anxiety.<sup>7,8</sup> High  
59 levels of social and family support are associated with greater maternal self-efficacy in  
60 first time mothers,<sup>9</sup> yet this support may be missing during the pandemic due to physical  
61 distancing recommendations, potentially leading to low maternal self-efficacy.

62 Innovative solutions to bridge the postpartum care gap, such as mobile health  
63 (mHealth), are more important than ever. The benefits of mHealth include personalized  
64 information, the ability to connect with others, receiving reassurance, and monitoring  
65 changes.<sup>10,11</sup> An example of this is text4baby, a perinatal text message intervention in  
66 the United States, covering topics between pregnancy and the first year, including  
67 nutrition, flu prevention, mental health, breastfeeding, and immunization.<sup>12</sup> Text4baby  
68 has shown promise in targeting perinatal women living in low-income to encourage  
69 adaptation of health behaviours,<sup>13,14</sup> however, such a perinatal program does not exist in  
70 Canada. Thus, our team developed *Essential Coaching for Every Mother*, a text  
71 message program designed to send daily messages during the immediate six-week  
72 postpartum period.<sup>15</sup> *Essential Coaching for Every Mother* was designed prior to  
73 COVID-19 but had not yet been evaluated. With the outbreak of COVID-19 and the  
74 opportunity to fill the sudden gap in postpartum education and support, the program was  
75 modified and offered immediately. The primary objective of this study is to evaluate the

76 preliminary impact of *Essential Coaching for Every Mother* on maternal self-efficacy,  
77 social support, postpartum anxiety, and depression. The secondary objective was to  
78 explore the acceptability of the *Essential Coaching for Every Mother* program (COVID-  
79 19 stream).

## 80 **Methods**

### 81 *Study Population & Sample Size*

82 At IWK Health, approximately 169 primiparous women give birth each month.<sup>16</sup> As  
83 this was part of a feasibility study, no power calculations were conducted. Instead, the  
84 target was to recruit 15% of primiparous women who gave birth over a three-month  
85 period (n=75 from an estimate of 500 expected births). First time mothers were targeted  
86 to minimize the confounding factor of parity.<sup>17,18</sup>

87 To participate, women must (1) have given birth to their first baby at IWK  
88 Health and live in Nova Scotia; (2) have daily access to a mobile phone with text  
89 message capabilities; (3) be over 18 years of age; and (4) speak and read English.  
90 Women were excluded if their baby was over 21 days old at time of recruitment. No  
91 exclusions were made for mothers of infants who required care in a neonatal intensive  
92 care unit or if their infant had any major abnormalities.

### 93 *Design*

94 This was a prospective pre-post study to pilot the *Essential Coaching for Every Mother*  
95 program with first time mothers in Nova Scotia, Canada between July 15th and  
96 September 19th, 2020.

### 97 *Procedures*

98 The recruitment process was reported elsewhere.<sup>19</sup> Briefly, women were recruited via  
99 social media, news, and study posters in the hospital and could indicate interest in  
100 participating between 37 weeks' gestation and birth (considered antenatal recruitment)

101 or could enrol after they gave birth up to three weeks postpartum (considered  
102 postpartum recruitment). *Essential Coaching for Every Mother* messages are sent based  
103 on delivery date, with messages designed to start the evening of the second day after  
104 birth. Participants could enrol up to 21 days postpartum and participants who enrolled  
105 late did not receive messages programmed to be sent earlier in the program.

106 Surveys were collected at two time points – enrolment (shortly after birth) and  
107 after the program was completed (six-weeks postpartum). Women were able to message  
108 “STOP” to withdraw from the study at any time at which point they stopped receiving  
109 messages and were no longer asked to complete surveys.

#### 110 *Intervention*

111 *Essential Coaching for Every Mother* is a six-week postpartum text message  
112 program that was developed in consultation with postpartum mothers and healthcare  
113 providers with the goal of improving women’s psychosocial outcomes in the immediate  
114 postpartum period.<sup>15</sup> *Essential Coaching for Every Mother* (COVID-19 stream)  
115 contained 56 messages related to newborn care and maternal mental health, with nine  
116 messages modified to be consistent with postpartum care provided during COVID-19  
117 and five COVID-19 specific messages added. Feedback on the modifications was  
118 obtained from three mothers and seven healthcare providers who participated in the  
119 original development.<sup>15</sup> Table 1 lists the topics covered in both the original program as  
120 well as the COVID-19 stream. *Essential Coaching for Every Mother* sends twice daily  
121 messages during the first two weeks, and then one daily message for the following four  
122 weeks.<sup>15</sup> In the COVID-19 stream, there were three days in the first two weeks in which  
123 a third message was sent. Women self-selected preference for breastfeeding or formula  
124 feeding messages which they were able to modify. While the messages were only one-  
125 way, they were personalized with the mothers’ name, the infant’s name, and the infant’s

126 gender. Additional resources were often offered as part of the texts for participants if  
127 they desired more information on a topic. The TextIt platform was used to program and  
128 schedule the messages and the Twillo gateway service was used to send and receive  
129 messages to participants.<sup>20,21</sup>

### 130 *Measures*

131 Background maternal demographics and newborn characteristics were collected  
132 at enrolment. At six-weeks, a survey collected data on whether mothers had any  
133 postnatal healthcare contacts or concerns for themselves or their infant. At both time  
134 points, participants completed standardized assessments of self-efficacy (primary  
135 outcome) as well as social support, postpartum anxiety, postpartum depression, and  
136 COVID-19 anxiety and stress (secondary outcomes). Participants were also asked to  
137 rate how beneficial they found the *Essential Coaching for Every Mother* program on the  
138 above psychosocial outcomes on a 5-point scale and completed an evaluative  
139 component on their experience with the program.

140 Maternal self-efficacy was measured using the Karitane Parenting Confidence  
141 Scale (KPCS) which is a 15-item tool to assess perceived self-efficacy of mothers of  
142 newborns.<sup>22</sup> A cut-off score of 39 or less (out of a possible 45) is considered to be a  
143 clinically low perceived parenting self-efficacy with scores below 31 considered to be  
144 in the moderate or severe range.<sup>22</sup>

145 Social support was measured through the Multidimensional Scale of Perceived  
146 Social Support (MSPSS).<sup>23</sup> This scale is a measurement of how much support a parent  
147 feels they get from family, friends and significant others from which subscales from  
148 each can be calculated as well as a total score.<sup>23</sup>

149 Postpartum anxiety was measured using the Postpartum Specific Anxiety Scale  
150 (PSAS).<sup>24</sup> The PSAS is a valid and reliable measure to assess anxiety during the first

151 six-months postpartum.<sup>24</sup> The State-Trait Anxiety Inventory (STAI)<sup>19</sup> was used to  
152 measure general anxiety; STAI-State has 20 items for assessing state anxiety, with  
153 higher scores indicating greater anxiety.<sup>25</sup>

154 Postpartum depression was measured using the 10-item Edinburgh Postnatal  
155 Depression Scale (EPDS).<sup>26</sup> This scale can be used to screen mothers at risk for  
156 developing postpartum depression, with a score above 14 (out of 30) indicating a  
157 likelihood of having or developing postpartum depression.<sup>26</sup>

158 Anxiety specific to COVID-19 was measured using the Coronavirus Anxiety  
159 Scale (CAS).<sup>27</sup> This is a 5-item scale developed specifically to be a brief mental health  
160 screener to identify probable cases of dysfunctional anxiety associated with the COVID-  
161 19 crisis.<sup>27</sup> The Impact of Stressful Event Scale – Revised (IES-R)<sup>28</sup> was used to  
162 measure the impact of COVID-19 related stress. This 22-item self-report scale assesses  
163 subjective distress caused by traumatic event, which for our purposes was the COVID-  
164 19 pandemic. The IES-R yields a total score (ranging from 0 to 12) and subscale scores  
165 can also be calculated for the Intrusion, Avoidance, and Hyperarousal subscales  
166 (ranging from 0-4).<sup>28</sup>

### 167 *Analysis*

168 Data were analysed using Statistical Package for Social Sciences version 26.  
169 Demographic characteristics are expressed in means and standard deviations and  
170 percentages, as applicable. A p-value of 0.05 was considered significant for all  
171 outcomes. For the first objective, paired t-tests were used to determine changes from  
172 baseline to follow-up. As this was an exploratory study, consideration of covariates  
173 occurred (i.e., number of messages received, perinatal timing of enrolment, maternal  
174 age). Participants who had incomplete paired data (e.g., missing a fully complete  
175 questionnaire at one of the time points) were excluded from the analysis on that

176 outcome. For the second objective, thematic analysis was used to analyse qualitative  
177 responses, which was led by the first author.<sup>29</sup>

## 178 **Results**

### 179 *Participants*

180 A total of 96 participants enrolled in the study, with 200 potential participants  
181 initiating contact, 70% antenatally.<sup>19</sup> Overall, 95 were not eligible, nine were not  
182 interested, four withdrew after enrolling, and four did not complete the baseline survey.  
183 Out of the 88 remaining participants, 76 (86.4%) fully completed both surveys, 8 (9.1%)  
184 had partial baseline and 8 (9.1%) had partial or incomplete follow-up survey data.

185 Women were on average 30.81 years of age (standard deviation [SD]=4.7). Most  
186 identified as heterosexual (91.3%), white (87.5%) and were married (67.5%) or  
187 common-law (26.3%). Over half (51.8%) had a household income over \$100,000CAN.  
188 Almost all women had singleton births (98.8%). Women were on average 39.3 weeks  
189 pregnant when they gave birth (SD=1.5 weeks, range=33.5-42 weeks). For 87.5% of  
190 participants, this was a planned pregnancy, and 67.5% had a vaginal birth, 32.5% had  
191 caesarean sections. Thirty percent had a history of diagnosed anxiety or depression.

192 Of the 88 participants enrolled, 42 (47.7%) received the full 56 messages.  
193 Women who enrolled late received on average 45.36 messages (SD=9.9 messages,  
194 range=27-55). Seventy-eight participants (88.6%) opted in for breastfeeding messages,  
195 with two participants changing to formula. The average time between completion of the  
196 baseline survey and follow-up survey was 36.8 days or 5.25 weeks (SD=6.28 days,  
197 range=22-53 days).

### 198 *Psychosocial Outcomes*

199 Changes in psychosocial outcomes are shown in Table 2. While there were some  
200 significant correlations, when examining the scatterplots, no clear relationship of the



201 covariates could be determined, and thus no covariates were considered in the analysis.  
202 Overall, self-efficacy improved between baseline and follow-up and anxiety measured  
203 using the STAI-State showed a significant decline. No significant changes over time  
204 were found across the other outcome measures (social support, postpartum specific  
205 anxiety, postpartum depression, COVID-19 related stress or anxiety).

#### 206 *Acceptability*

207 Most participants (89.0%) felt that the number of messages were just right while  
208 the rest felt there were too few (7.3%) or too many (3.7%). Most (84.5%) felt the  
209 messages contained all the information they needed related to caring for a newborn and  
210 98.8% indicated they would recommend the program to other new mothers. Table 3  
211 shows how helpful participants found *Essential Coaching for Every Mother* in relation  
212 to the psychosocial outcomes measured on a scale from 1 (not at all) to 5 (completely).

213 Areas where participants wanted more information were primarily related to  
214 breastfeeding and newborn sleep. Participants generally felt the timing of messages was  
215 relevant to their newborn's development. One mother said: "The messages I received  
216 were so relevant to the stage we were in! Sometimes I felt as though someone was  
217 listening to my conversations. Very, very helpful." A few women did comment that the  
218 messages arrived after they had already experienced that concern, but the majority  
219 considered the timing appropriate.

220 Women felt that the messages were helpful, particularly in light of the reduced  
221 face-to-face healthcare provider support available during COVID-19 pandemic  
222 restrictions. Participants also indicated that the messages would be helpful even beyond  
223 COVID-19 and they felt re-assured in the information they were getting: "It made me  
224 feel more confident about the information I was obtaining rather than what I would  
225 google." However, some participants felt that due to the low COVID-19 prevalence in

226 Nova Scotia at the time of the program implementation, they had low COVID-19  
227 anxiety and stress already, thus the COVID-19 messages were not that helpful and  
228 increased their anxiety. One participant explained: “Mainly because I didn't have any  
229 concerns about COVID-19, I found those messages to be the least helpful, but I think  
230 they were still important.”

231 Participants reported feeling as though they had access to a daily digital nurse:  
232 “It was nice just to be having constant communication. Our families both live outside  
233 the Atlantic bubble, so we haven't had the initial support that we had always envisioned.  
234 Having the texts felt like we were being cared for and gave advice that we imagined our  
235 parents would give.” Women indicated that the messages made them feel less alone,  
236 particularly in relation to the loss of family support and peer support parenting groups.  
237 Another aspect of the program that participants appreciated was the normalization of  
238 what to expect with their newborn. One participant commented: “Messages of the  
239 witching hour normalized our witching hour and I felt less concerned that something  
240 was wrong and more confident that this was normal.” Another participant explained:  
241 “There were several occasions when we were experiencing something, and then the text  
242 would indicate this was a normal time to experience that thing. It made me feel like we  
243 were hitting milestones (or challenges) as we should. There also was a feeling of  
244 togetherness.”

245 Overall, what participants felt what they liked most was the consistency of the  
246 daily messages and the personalization with their child's name. One mother said: “I  
247 liked the consistency of the texts and looked forward to receiving them”. Participants  
248 felt that the information validated what they already knew and/or what they were  
249 already doing. The information was consistent with messaging they were receiving from  
250 other healthcare sources. Participants appreciated that the information came directly to

251 them, that they did not have to seek it out and that they could trust the information  
252 provided.

253 Areas for improvement included enhancing the ability to reply and/or engage  
254 with the messages or a support person with whom they could ask additional questions or  
255 to seek further classification. A few women commented that being able to tailor or opt  
256 in for additional messages would have been helpful: "... tailoring it to responses of  
257 mothers if they have certain issues [that] they would like more support with [such as]  
258 breastfeeding or colic." Many women suggested the *Essential Coaching for Every*  
259 *Mother* continue beyond the first six-weeks postpartum: "Would love for it to go on  
260 longer. Even if the texts came less often but continued until 6 months. At 6 weeks I feel  
261 I've figured some out but ... I still have lots of questions and know we have lots ahead  
262 of us to figure out with months 4-5...". Women also suggested that the program be  
263 available for their partner, as one participant said: "I ended up sending him a screen shot  
264 of the messages most days".

## 265 **Discussion**

266 The primary objective was to evaluate the preliminary impact of *Essential*  
267 *Coaching for Every Mother* on maternal self-efficacy, social support, postpartum  
268 anxiety, and postpartum depression. This study found that maternal self-efficacy  
269 increased, with an improvement from the moderate clinical range (i.e., a score of 31 to  
270 35 out of 45) to the mild clinical range (i.e., 36 to 39 out of 45), and postpartum anxiety  
271 measured using the STAI-State decreased between baseline and the 6-week follow-up.  
272 However, there were no significant changes on feelings of social support, postpartum  
273 specific anxiety, postpartum depression, or COVID-19 anxiety and stress. The second  
274 objective was to explore the acceptability of the *Essential Coaching for Every Mother*  
275 program provided during COVID-19. Overall, participants were satisfied with the

276 program, with almost all participants willing to recommend the program to other  
277 mothers. While there was room for improvement, there were aspects of the program that  
278 women appreciated, including the daily messages with information they knew they  
279 could trust, the general appropriateness of the timing of the messages in relation to their  
280 newborn's age, and the support and normalization of the postpartum experience the  
281 messages provided.

282         Although it is encouraging that self-efficacy increased and anxiety decreased  
283 between baseline and six-weeks postpartum, it is difficult to delineate the impact of  
284 *Essential Coaching for Every Mother* above and beyond changes that can occur as  
285 women become more comfortable in their parenting role. Interestingly, a decrease in  
286 anxiety measured using the STAI-State was found yet there was no significant  
287 difference when measured using the postpartum-specific anxiety measure. The STAI-  
288 State asks general questions around anxiety such as feeling calm or secure within the  
289 past seven days,<sup>33</sup> whereas the PSAS is very specific to the postpartum period, asking  
290 questions around worry about baby's weight or bonding.<sup>24</sup> Thus, these measurement  
291 tools may be getting at different aspects of anxiety in the postpartum period. The  
292 challenge is that there is no consensus to date on how to best measure postpartum  
293 anxiety.<sup>34</sup> A systematic review on anxiety measurement tools used in the perinatal  
294 period found the most common measurement tools were the General Health  
295 Questionnaire, the STAI, and the Hospital Anxiety and Depression Scales with  
296 significant heterogeneity of measurement tools across studies.<sup>34</sup> On the other hand,  
297 Dennis and colleagues<sup>35</sup> found that most studies used the STAI to assess postpartum  
298 anxiety in their systematic review on postpartum anxiety prevalence. One challenge is  
299 that measurement tools used to measure postpartum anxiety were not specifically

300 designed for this purpose.<sup>34</sup> Further work is needed to understand and identify the best  
301 approach to measuring postpartum anxiety.

302         Given the emerging evidence around increased postpartum depression and  
303 perinatal anxiety in women during the COVID-19 pandemic,<sup>7,8</sup> it is important to  
304 consider the impact and opportunity of virtually delivered interventions. In terms of  
305 acceptability of the *Essential Coaching for Every Mother* program, almost all women  
306 felt the program was acceptable in terms of timing and content and was recommendable  
307 to other women. Women felt supported in receiving the personalized messages and even  
308 desired the program to continue beyond the six-weeks of the intervention period.  
309 Interestingly, while the messages were modified to provide some content related to  
310 COVID-19, due to the low prevalence of the virus in Nova Scotia while the program  
311 was implemented, this had limited impact. Thus, further iterations of the program  
312 should be modified to reflect primarily changes in care, rather than repetition of  
313 recommendations around physical distancing and safety. This finding may have been  
314 different if implemented where epidemiology of the virus was higher. Nevertheless, the  
315 *Essential Coaching for Every Mother* program was well-received and should progress to  
316 evaluation in a randomized controlled trial (RCT) to determine true effectiveness on  
317 psychosocial outcomes. While it will be important for the RCT to determine initial  
318 effectiveness of the program on mothers in the first six weeks, further iterations of  
319 *Essential Coaching for Every Mother* could consider the expansion to partners, and  
320 beyond the initial six weeks.

321         Due to the flexible nature of remote recruitment, there was significant variation  
322 in when women enrolled in the program - with under half of the participants receiving  
323 the full slate of messages. However, when considering the impact of the number of  
324 messages missed, no clear relationship or trend could be determined. It did not appear

325 that the number of messages missed played a significant role in influencing the  
326 psychosocial outcomes. For implementation as an RCT, a shorter postpartum  
327 enrollment window may be beneficial to increase the number of messages received as  
328 designed as well as ensure there is sufficient time gap between baseline and follow-up  
329 surveys.

### 330 *Limitations*

331 While it is important to explore the potential impact of the program on  
332 participants, it is difficult to tease apart the impact of the program compared to the  
333 normal psychosocial adjustment that occurs during the postpartum period. Thus, the  
334 findings from this feasibility study should be interpreted with that lens. Additionally,  
335 not all participants completed the survey in full at both time points, thus there were  
336 differences in the sample size across each outcome variable. The survey may have been  
337 too time consuming, especially for new mothers, suggesting it is important to reduce the  
338 number of assessment tools used in future iterations to enhance completion rates.

### 339 **Conclusion**

340 In conclusion, preliminary findings suggest that *Essential Coaching for Every Mother*  
341 may play a role increasing maternal self-efficacy and decreasing generalized anxiety,  
342 although future work with a control group is needed to delineate the true effect of the  
343 program beyond changes that occur in the postpartum period generally. Overall,  
344 mothers were satisfied with the *Essential Coaching for Every Mother* program and  
345 would recommend this to other mothers, during the COVID-19 pandemic and beyond.  
346 *Essential Coaching for Every Mother* holds potential to improve maternal outcomes in  
347 the immediate postpartum period.

## 348 **References**

- 349 1. Chalmers B, Dzakpasu S, Heaman M, Kaczorowski J. The Canadian Maternity  
350 Experiences Survey: An Overview of Findings. *J Obstet Gynaecol Canada*.  
351 2008;30(3):217-228. doi:10.1016/S1701-2163(16)32758-X
- 352 2. Chivers BR, Garad RM, Boyle JA, Skouteris H, Teede HJ, Harrison CL.  
353 Perinatal distress during COVID-19: a thematic analysis of an online parenting  
354 forum. (Preprint). *J Med Internet Res*. 2020;22(9):1-8. doi:10.2196/22002
- 355 3. Nova Scotia Health Authority. Temporary service and facility closure notices  
356 from Nova Scotia Health Authority. Webpage. Published 2020. Accessed April  
357 18, 2020. [http://www.nshealth.ca/temporary-service-and-facility-closure-notices-](http://www.nshealth.ca/temporary-service-and-facility-closure-notices-nova-scotia-health-authority-updated-310-pm-march-16)  
358 [nova-scotia-health-authority-updated-310-pm-march-16](http://www.nshealth.ca/temporary-service-and-facility-closure-notices-nova-scotia-health-authority-updated-310-pm-march-16)
- 359 4. Aston M, Price S, Monaghan J, Sim M, Hunter A, Little V. Navigating and  
360 negotiating information and support: Experiences of first-time mothers. *J Clin*  
361 *Nurs*. 2018;27(3-4):640-649. doi:10.1111/jocn.13970
- 362 5. Johnson SA. ‘Intimate mothering publics’: comparing face-to-face support  
363 groups and Internet use for women seeking information and advice in the  
364 transition to first-time motherhood. *Cult Health Sex*. 2015;17(2):237-251.  
365 doi:10.1080/13691058.2014.968807
- 366 6. Reproductive Care Program of Nova Scotia. Healthy Babies, Healthy Families:  
367 Postpartum & Postnatal Guidelines. Published online 2002:1-116.  
368 <http://novascotia.ca/dhw/publications/Public-Health-Education/Postpartum>  
369 [Guidelines.pdf](http://novascotia.ca/dhw/publications/Public-Health-Education/Postpartum)
- 370 7. Davenport M, Meyer S, Meah VL, Strynadka MC, Khurana R. Moms are not  
371 OK: COVID-19 and maternal mental health. *Front Glob Women’s Heal*.

- 372 2020;1(June):1-6. doi:10.3389/FGWH.2020.00001
- 373 8. Lebel C, MacKinnon A, Bagshawe M, Tomfohr-Madsen L, Giesbrecht G.  
374 Elevated depression and anxiety among pregnant individuals during the COVID-  
375 19 pandemic. *J Affect Disord.* 2020;277:5-13. doi:10.31234/osf.io/gdhkt
- 376 9. Esmaelzadeh Saeieh S, Rahimzadeh M, Yazdkhasti M, Torkashvand S. Perceived  
377 social support and maternal competence in primipara women during pregnancy  
378 and after childbirth. *Int J Community Based Nurs Midwifery.* 2017;5(4):408-416.
- 379 10. Connor K, Wambach K, Baird MB. Descriptive, Qualitative Study of Women  
380 Who Use Mobile Health Applications to Obtain Perinatal Health Information. *J*  
381 *Obstet Gynecol Neonatal Nurs.* 2018;47(6):728-737.  
382 doi:10.1016/j.jogn.2018.04.138
- 383 11. Lupton D, Pedersen S. An Australian survey of women's use of pregnancy and  
384 parenting apps. *Women and Birth.* 2016;29(4):368-375.  
385 doi:10.1016/j.wombi.2016.01.008
- 386 12. Jordan ET, Ray EM, Johnson P, Evans WD. Text4Baby: Using text messaging to  
387 improve maternal and newborn health. *Nurs Womens Health.* 2011;15:206-212.  
388 doi:10.1111/j.1751-486X.2011.01635.x
- 389 13. Evans W, Wallace JL, Snider J. Pilot evaluation of the text4baby mobile health  
390 program. *BMC Public Health.* 2012;12(1):1. doi:10.1186/1471-2458-12-1031
- 391 14. Evans W, Nielsen PE, Szekely DR, et al. Dose-Response Effects of the  
392 Text4baby Mobile Health Program: Randomized Controlled Trial. *JMIR mHealth*  
393 *uHealth.* 2015;3(1):e12. doi:10.2196/mhealth.3909
- 394 15. Dol J, Tomblin G, Aston M, Mcmillan D, Campbell-yeo M. Design,  
395 development and usability testing of Essential Coaching for Every Mother: A  
396 postnatal text message educational intervention. *Women and Birth.* 2020;(2019).



- 397           doi:10.1016/j.wombi.2020.05.004
- 398    16.    Reproductive Care Program of Nova Scotia. The Nova Scotia Atlee Perinatal  
399           Database. Published online 2020.
- 400    17.    Gameiro S, Moura-Ramos M, Canavarro MC. Maternal adjustment to the birth of  
401           a child: Primiparity versus multiparity. *J Reprod Infant Psychol*. 2009;27(3):269-  
402           286. doi:10.1080/02646830802350898
- 403    18.    Figueiredo B, Conde A. Anxiety and depression symptoms in women and men  
404           from early pregnancy to 3-months postpartum: Parity differences and effects. *J*  
405           *Affect Disord*. 2011;132(1-2):146-157. doi:10.1016/j.jad.2011.02.007
- 406    19.    Dol J, Murphy GT, McMillan D, Aston M, Campbell-Yeo M. Remote  
407           recruitment for Essential Coaching for Every Mother during COVID-19.  
408           *medRxiv*. Published online January 1, 2021:2021.03.09.21253071.  
409           doi:10.1101/2021.03.09.21253071
- 410    20.    TextIt. TextIt. Webpage. Published 2017. Accessed May 3, 2018. <http://textit.in>
- 411    21.    Twilio. Twilio. Published 2018. Accessed October 24, 2018.  
412           <https://www.twilio.com>
- 413    22.    Črnčec R, Barnett B, Matthey S. Development of an instrument to assess  
414           perceived self-efficacy in the parents of infants. *Res Nurs Heal*. 2008;31(5):442-  
415           453. doi:10.1002/nur.20271
- 416    23.    Zimet GD, Powell SS, Farley GK, Werkman S, Berkoff KA. Psychometric  
417           Characteristics of the Multidimensional Scale of Perceived Social Support. *J Pers*  
418           *Assess*. 1990;55(3-4):610-617. doi:10.1080/00223891.1990.9674095
- 419    24.    Fallon V, Halford JCG, Bennett KM, Harrold JA. The Postpartum Specific  
420           Anxiety Scale: development and preliminary validation. *Arch Womens Ment*  
421           *Health*. 2016;19(6):1079-1090. doi:10.1007/s00737-016-0658-9

- 422 25. Spielberger CD, Gorsuch RL, Lushene R, Vagg PR, Jacobs GA. *Manual for the*  
423 *State-Trait Anxiety Inventory*. Consulting Psychologists Press; 1983.
- 424 26. Cox J, Holden J, Sagovksy R. Detection of Postnatal Depression: Development  
425 of the 10-item Edinburgh Postnatal Depression Scale. *Br J Psychiatry*.  
426 1987;150:782-786. doi:10.1007/978-94-007-1694-0\_2
- 427 27. Lee SA. Coronavirus Anxiety Scale: A brief mental health screener for COVID-  
428 19 related anxiety. *Death Stud*. 2020;44(7):393-401.  
429 doi:10.1080/07481187.2020.1748481
- 430 28. Weiss D. The Impact of Event Scale-Revised. In: Wilson JP, Keane TM, eds.  
431 *Assessing psychological Trauma and PTSD: A Practitioner's Handbook*. 2nd  
432 Editio. Guilford Press; 2007:168-189.
- 433 29. Braun V, Clarke V. Using thematic analysis in psychology. *Qual Res Psychol*.  
434 2006;3(2):77-101. doi:dx.doi.org/10.1191/1478088706qp063oa
- 435 30. Liyana Amin NA, Tam WWS, Shorey S. Enhancing first-time parents' self-  
436 efficacy: A systematic review and meta-analysis of universal parent education  
437 interventions' efficacy. *Int J Nurs Stud*. 2018;82(July 2017):149-162.  
438 doi:10.1016/j.ijnurstu.2018.03.021
- 439 31. Dol J, Richardson B, Tomblin Murphy G, Aston M, McMillan D, Campbell-Yeo  
440 M. Impact of mHealth interventions during the perinatal period on maternal  
441 psychosocial outcomes: a systematic review. *JBI Evid Synth*. 2020;18(1):30-55.  
442 doi:10.11124/jbisrir-d-19-00003
- 443 32. Albanese AM, Russo GR, Geller PA. The role of parental self-efficacy in parent  
444 and child well-being: A systematic review of associated outcomes. *Child Care*  
445 *Health Dev*. 2019;45(3):333-363. doi:10.1111/cch.12661
- 446 33. Wenzel A. State-Trait Anxiety Inventory. *SAGE Encycl Abnorm Clin Psychol*.

- 447           Published online 2017:3-4. doi:10.4135/9781483365817.n1316
- 448    34.    Meades R, Ayers S. Anxiety measures validated in perinatal populations: A  
449           systematic review. *J Affect Disord.* 2011;133(1-2):1-15.  
450           doi:10.1016/j.jad.2010.10.009
- 451    35.    Dennis C-L, Falah-Hassani K, Shiri R. Prevalence of antenatal and postnatal  
452           anxiety: Systematic review and meta-analysis. *Br J Psychiatry.* 2017;210(5):315-  
453           323. doi:10.1192/bjp.bp.116.187179
- 454    36.    Government of Nova Scotia. Novel coronavirus (COVID-19). Webpage.  
455           Published 2020. Accessed August 17, 2020. <https://novascotia.ca/coronavirus/>  
456

457 Table 1 Topics covered in Essential Coaching for Every Mother – COVID-19

| Essential Coaching for Every Mother – Original version (n=53)                                                                                                                                                                                              | Essential Coaching for Every Mother – COVID-19 version (n=56)                                                                                                                                                                                                                      |
|------------------------------------------------------------------------------------------------------------------------------------------------------------------------------------------------------------------------------------------------------------|------------------------------------------------------------------------------------------------------------------------------------------------------------------------------------------------------------------------------------------------------------------------------------|
| Anxiety (3)<br>Depression (3)<br>Maternal self-care (5)<br>Postnatal follow-up (4)<br>Breastfeeding (5)/Formula (5)<br>Feeding (4)<br>Infant concerns (5)<br>Cord care (3)<br>Well-baby care (6)<br>Normal development (6)<br>Crying (5)<br>Safe sleep (4) | Anxiety (3)*<br>Depression (2)<br>Maternal self-care (5)*<br>Postnatal follow-up (4)***<br>Breastfeeding (5)**/Formula (5)<br>Feeding (4)<br>Infant concerns (4)<br>Cord care (3)<br>Well-baby care (6)*<br>Normal development (6)<br>Crying (5)<br>Safe sleep (4)<br>COVID-19 (5) |

458 \* Contains an edited message related to COVID-19

459

460

461 Table 2 Changes in Psychosocial Outcomes from Baseline to Follow-Up

|                              | N         | Baseline M (SD)      | Follow-up M (SD)    | Mean Difference M(SD) | Effect Size (r) - Correlation | p            |
|------------------------------|-----------|----------------------|---------------------|-----------------------|-------------------------------|--------------|
| Self-Efficacy (KPCS)         | <b>83</b> | <b>33.70 (6.57)</b>  | <b>37.92 (5.54)</b> | <b>- 4.22 (5.17)</b>  | <b>0.65</b>                   | <b>0.000</b> |
| Social Support (MSPSS)       |           |                      |                     |                       |                               |              |
| Overall                      | 82        | 6.35 (0.82)          | 6.29 (0.78)         | 0.06 (0.67)           | 0.66                          | 0.43         |
| Significant other            | 83        | 6.71 (0.68)          | 6.69 (0.50)         | 0.24 (0.56)           | 0.58                          | 0.70         |
| Family                       | 82        | 6.24 (1.12)          | 6.18 (1.11)         | 0.06 (0.79)           | 0.75                          | 0.49         |
| Friends                      | 83        | 6.11 (1.06)          | 6.01 (1.28)         | 0.10 (1.07)           | 0.60                          | 0.40         |
| Anxiety                      |           |                      |                     |                       |                               |              |
| Postpartum Specific (PSAS)   | 81        | 99.27 (20.55)        | 87.88 (20.48)       | 1.39 (16.93)          | 0.66                          | 0.46         |
| General (STAI - State)       | <b>80</b> | <b>38.49 (10.82)</b> | <b>34.79 (8.94)</b> | <b>3.70 (11.24)</b>   | <b>0.37</b>                   | <b>0.004</b> |
| Postpartum Depression (EPDS) | 80        | 7.6 (4.83)           | 7.30 (5.01)         | 0.30 (4.32)           | 0.62                          | 0.54         |
| COVID-19                     |           |                      |                     |                       |                               |              |
| Anxiety (CAS)                | 78        | 1.19 (2.65)          | 1.09 (3.12)         | 0.10 (3.18)           | 0.45                          | 0.78         |
| Stress (IES-R)               | 76        | 1.47 (1.58)          | 1.47 (1.96)         | -0.01 (1.26)          | 0.76                          | 0.97         |

462 Karitane Parenting Confidence Scale (KPCS); Multidimensional Scale of Perceived Social Support (MSPSS); Postpartum Specific  
 463 Anxiety Scale (PSAS); State-Trait Anxiety Inventory (STAI); Edinburgh Postnatal Depression Scale (EPDS); Coronavirus Anxiety  
 464 Scale (CAS); Impact of Stressful Event Scale – Revised (IES-R)  
 465

466

467 Table 3 Participant self-reported rating of benefit of *Essential Coaching for Every*

468 *Mother* on Psychosocial Outcomes

|                          | N  | Rating<br>M (SD) | Rating<br>Median (range) |
|--------------------------|----|------------------|--------------------------|
| Overall satisfaction     | 82 | 4.45 (0.58)      | 4.68 (2.4 - 5)           |
| Self-Efficacy            | 82 | 3.95 (1.10)      | 4.00 (0.1--5.0)          |
| Social Support (overall) | 82 | 3.63 (1.31)      | 3.90 (0.00-5.0)          |
| Anxiety (overall)        | 82 | 3.30 (1.34)      | 3.65 (0.00-5.0)          |
| Postpartum Depression    | 82 | 2.83 (1.61)      | 2.85 (0.00-5.00)         |
| COVID-19 Anxiety         | 83 | 2.72 (1.57)      | 2.65 (0.00-5.00)         |
| COVID-19 Stress          | 83 | 2.79 (1.53)      | 2.65 (0.00-5.00)         |

469

470

471 **DECLARATIONS**

472 **Funding:** JD is funded through a Canadian Institute of Health Research (CIHR)  
 473 Doctoral Award to Honour Nelson Mandela (FRN154341) as a PhD in Health trainee at  
 474 Dalhousie University. This project was funded from the CIHR Doctoral Award above as  
 475 well as a BRIC (Building Research for Integrated Primary Healthcare) Nova Scotia  
 476 Student Research Award held by Ms. Dol.

477  
 478 **Conflicts of interest/Competing interests:** Nothing to declare.  
 479

480 **Ethics approval:** All procedures performed in studies involving human participants  
 481 were in accordance with the ethical standards of the institutional research committee  
 482 (IWK Health REB#1024984) and with the 1964 Helsinki declaration and its later  
 483 amendments or comparable ethical standards.  
 484

485 **Consent to participate:** Informed consent was obtained from all individual participants  
 486 included  
 487 in the study. All participants consented to the following statement: “I have reviewed all  
 488 of the information in this consent form related to the study called: Feasibility of  
 489 implementing Essential Coaching for Every Mother during COVID-19 and I have been  
 490 given the opportunity to discuss this study with a research team member. I do not have  
 491 any further questions.”  
 492

493 **Consent for publication:** Additional informed consent was obtained from all  
 494 individual participants for whom identifying information is included in this article. All  
 495 participants who are quoted consented to the following statement: “I agree that direct  
 496 quotes from my survey may be used without identifying me.”  
 497

498 **Availability of data and material:** Due to the ethical approval obtained, data cannot be  
 499 made available.  
 500

501 **Authors' contributions**

| Criteria                                                                                                                                                                                  | Author Initials          |
|-------------------------------------------------------------------------------------------------------------------------------------------------------------------------------------------|--------------------------|
| Made substantial contributions to conception and design, or acquisition of data, or analysis and interpretation of data;                                                                  | JD, GTM, MA, DM, AG, MCY |
| Involved in drafting the manuscript or revising it critically for important intellectual content;                                                                                         | JD, GTM, MA, DM, AG, MCY |
| Given final approval of the version to be published. Each author should have participated sufficiently in the work to take public responsibility for appropriate portions of the content; | JD, GTM, MA, DM, AG, MCY |
| Agreed to be accountable for all aspects of the work in ensuring that questions related to the accuracy or integrity of any part of the work are appropriately investigated and resolved. | JD, GTM, MA, DM, AG, MCY |

502
